# Supplementary material for: Insights into the effect of surface functional groups on catalytic performance for hydrogen generation from sodium borohydride
Source: Royal Society of Chemistry journal article supplement (doi:10.1039/c6ra25016e), 2016-01-01
Supplement: c6ra25016e1.pdf [file c6ra25016e1.pdf]

Electronical Supporting Information

**Insights into the Effect of Surface Functional Groups on Catalytic  
Performance for Hydrogen Generation from Sodium Borohydride**

Xiang Feng<sup>a,\*</sup>, Zhaoning Song<sup>a</sup>, Tongtian Guo<sup>a</sup>, Rui Yang<sup>a</sup>, Yibin Liu<sup>a</sup>, Xiaobo Chen<sup>a</sup>, Chaohe Yang<sup>a,\*</sup>

*<sup>a</sup> State Key Laboratory of Heavy Oil Processing, China University of Petroleum (East  
China), Qingdao, 266580, China*

*\* Corresponding author. Tel.: +86-0532-86984710. Fax: +86-0532-86984710.*

*xiangfeng@upc.edu.cn; yangch@upc.edu.cn;*

**Table S1** Comparison of catalytic performance for NaBH<sub>4</sub> hydrolysis.

| Catalyst                 | Activation Energy E <sub>a</sub><br>(kJ/mol) | HGR <sup>b</sup><br>(mLmin <sup>-1</sup> g <sup>-1</sup> <sub>Metal</sub> ) | Ref.      |
|--------------------------|----------------------------------------------|-----------------------------------------------------------------------------|-----------|
| P(4-VP)BB-Ni             | 43.98                                        | 1803                                                                        | 51        |
| P(AMPS)-Ru               | n.i. <sup>a</sup>                            | 7462                                                                        | 52        |
| P(SGM)-Co                | 40.78                                        | 6859 (70°C)                                                                 | 53        |
| 1,4 BB-p(4-VP)-Co        | 47.60                                        | 20411 (70°C)                                                                | 54        |
| Pt-Ru/LiCoO <sub>2</sub> | n.i. <sup>a</sup>                            | 53000                                                                       | 55        |
| Pt/Resin-SH              | 64.27                                        | 980                                                                         | This work |
| Pt/Resin-NH              | 40.99                                        | 5500                                                                        | This work |
| Pt/Resin-NH              | 40.99                                        | 24400 (55°C)                                                                | This work |

a) n.i.: not informed.

b) Reaction temperature: room temperature.

**Reference:**

51. N. Sahiner, T. Turhan, L.A. Lyon, *Energy*, 2014, 66, 256.
52. T. Turhan, Y.A. Güvenilir, N. Sahiner, *Energy*, 2013, 55, 511.
53. S. Yildiz, N. Aktas, N. Sahiner, *Int. J. Hydrogen Energy*, 2014, 39: 14690.
54. N. Sahiner, S. Yildiz, H.A. Lohedan, *Appl. Catal. B*, 2015, 166-167: 145.2
55. P. Krishnan, K. L. Hsueh, S. D. Yim, *Appl. Catal. B* 2007, 77, 206.
